# Supplementary material for: Cirrus and water vapour transport in the tropical tropopause layer – Part 2: Roles of ice nucleation and sedimentation, cloud dynamics, and moisture conditions
Source: Copernicus journal article supplement (doi:10.5194/acp-14-12225-2014), 2014-11-20
Supplement: Supplementary file 1 [file acp-14-12225-2014-supplement.zip]

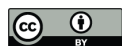

## *Supplement of*

# **Cirrus and water vapour transport in the tropical tropopause layer – Part 2: roles of ice nucleation and sedimentation, cloud dynamics, and moisture conditions**

**T. Dinh et al.**

*Correspondence to:* T. Dinh ([tdinh@princeton.edu](mailto:tdinh@princeton.edu))

- Supplement-Cover-Letter.pdf
- dinh14\_suppl.pdf
- movie1\_norad\_dry.gif
- movie2\_allphys\_dry.gif
- movie3\_norad\_moist.gif
- movie4\_allphys\_moist.gif
